# Supplementary material
Source: ML conference proceedings conference paper supplement (https://proceedings.neurips.cc/paper_files/paper/2020/hash/20b5e1cf8694af7a3c1ba4a87f073021-Abstract.html)

Average Variance

$10^{-6}$

$10^{-7}$

0.0

0.5

1.0

1.5

2.0

2.5

3.0

Training Iteration

$1e5$

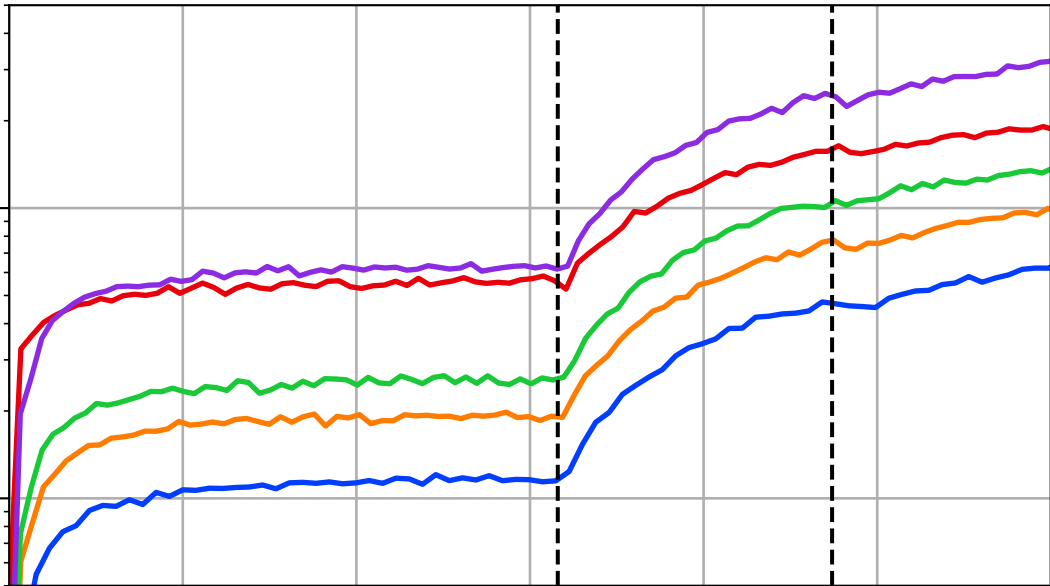

Supplement: Supplementary file [file 20b5e1cf8694af7a3c1ba4a87f073021-Supplemental.zip]
