# Supplementary material
Source: ML conference proceedings conference paper supplement (https://proceedings.neurips.cc/paper_files/paper/2020/hash/20b5e1cf8694af7a3c1ba4a87f073021-Abstract.html)

Test Accuracy (%)

60

40

20

0

1

2

3

4

5

Training Iteration

1e5

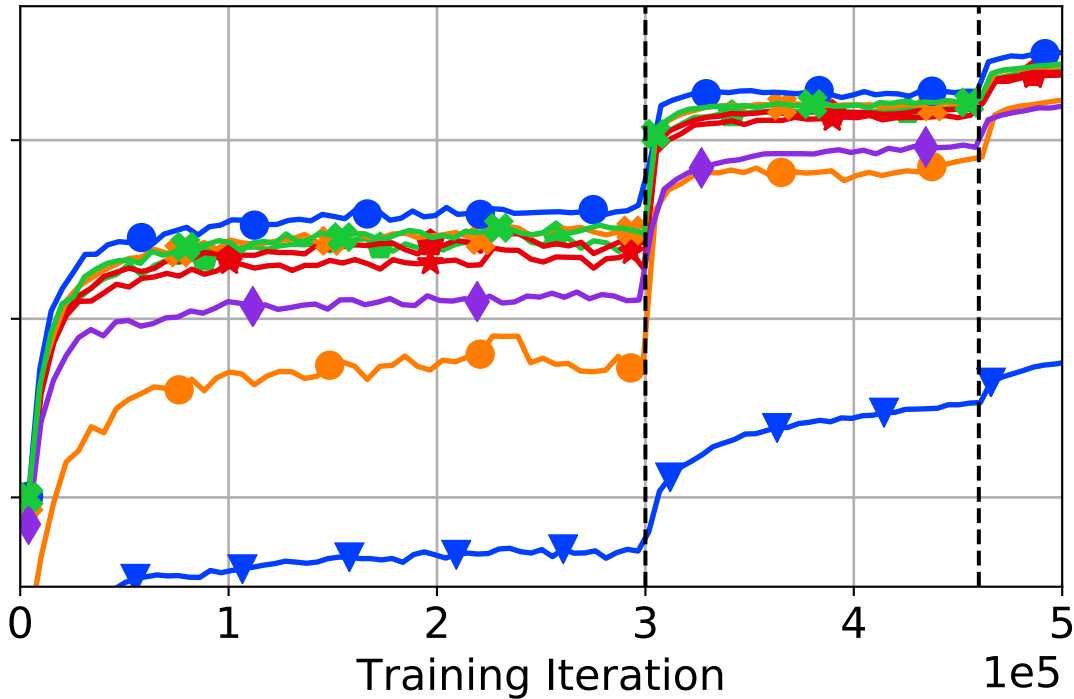

Supplement: Supplementary file [file 20b5e1cf8694af7a3c1ba4a87f073021-Supplemental.zip]
